# Supplementary material
Source: PubMed Central journal article supplement (PMC3330270)

anti-AJM-1

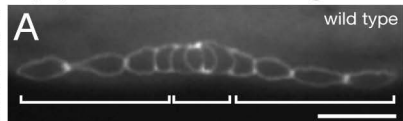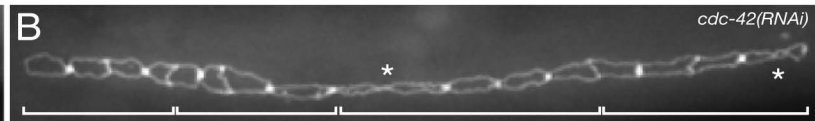

PAR-6::GFP

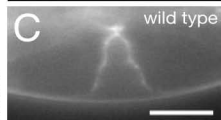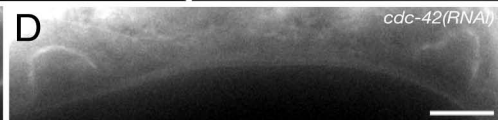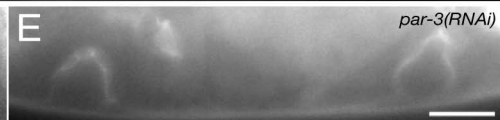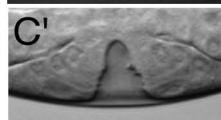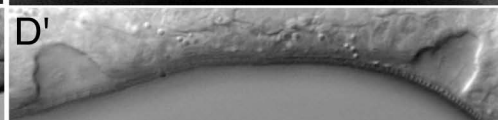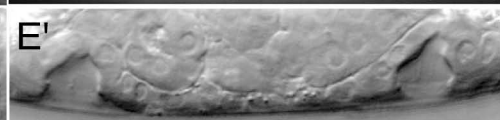

LET-413::GFP

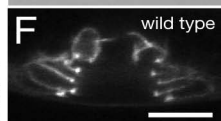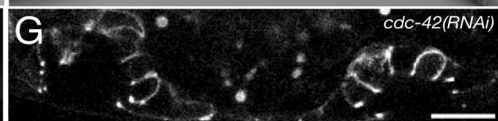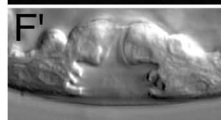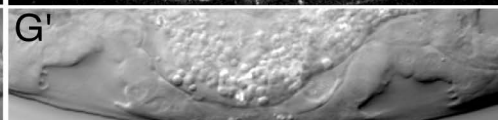

Welchman et al  
Supplemental Figure 2

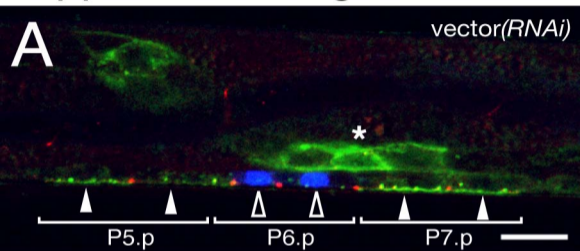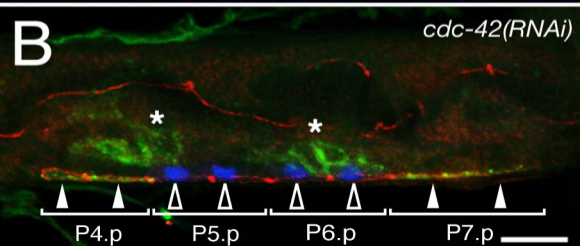

Supplemental Figure 3

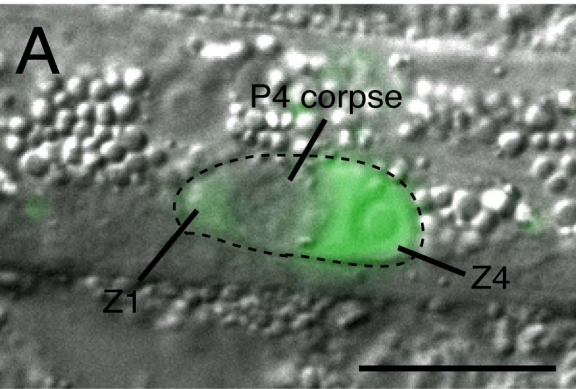

Supplement: NIHMS31106-supplement-Supp_Figs.pdf [file NIHMS31106-supplement-Supp_Figs.pdf]
